# Supplementary material for: AlN/Ti2CO2 van der Waals heterostructure: a direct Z-scheme photocatalyst for efficient photocatalytic water splitting
Source: Royal Society of Chemistry journal article supplement (doi:10.1039/d5ce00549c), 2025-01-01
Supplement: d5ce00549c1.pdf [file d5ce00549c1.pdf]

**Electronic Supplementary Information**

**AlN/Ti<sub>2</sub>CO<sub>2</sub> van der Waals heterostructure: a direct Z-scheme  
photocatalyst for efficient photocatalytic water splitting**

Yanfei Li, Zhi Xiao, Wen Qiao\*, Ru Bai, Tiejun Zhou, Shiming Yan\*

School of Electronics and Information, Hangzhou Dianzi University, Hangzhou 310018, China

\*Corresponding author:

email: shimingyan@hdu.edu.cn (Shiming Yan); wqiao@hdu.edu.cn (Wen Qiao)

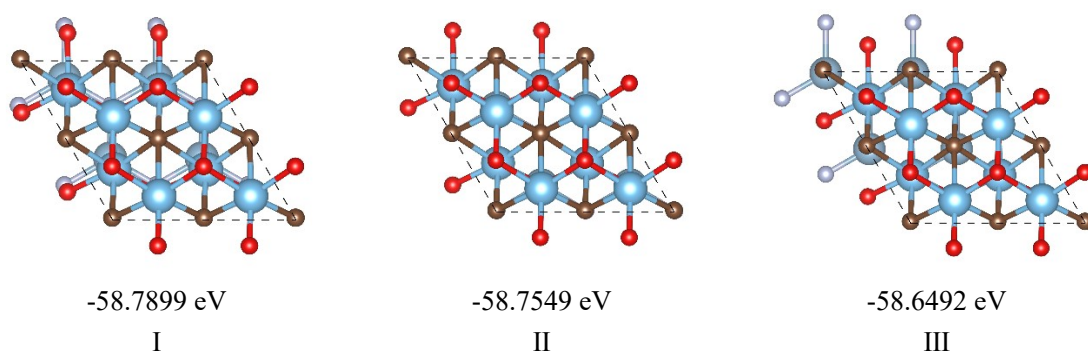

Figure S1. The structures of AlN/Ti<sub>2</sub>CO<sub>2</sub> heterostructures with different configurations and their free energies.

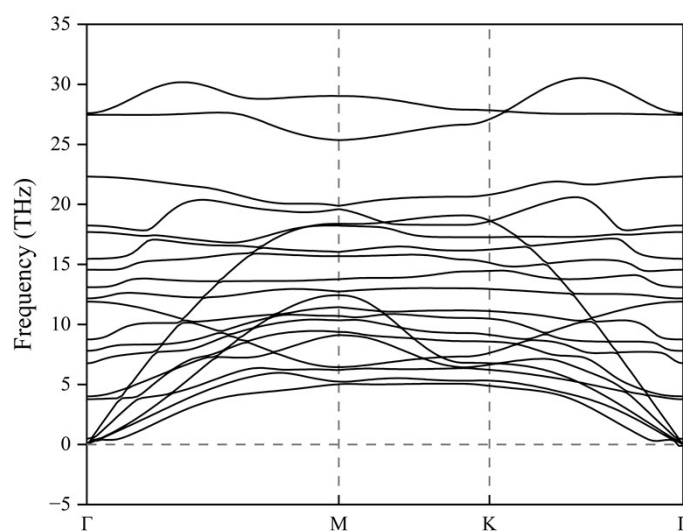

Figure S2. The phonon spectrum of AlN/Ti<sub>2</sub>CO<sub>2</sub> heterostructure.

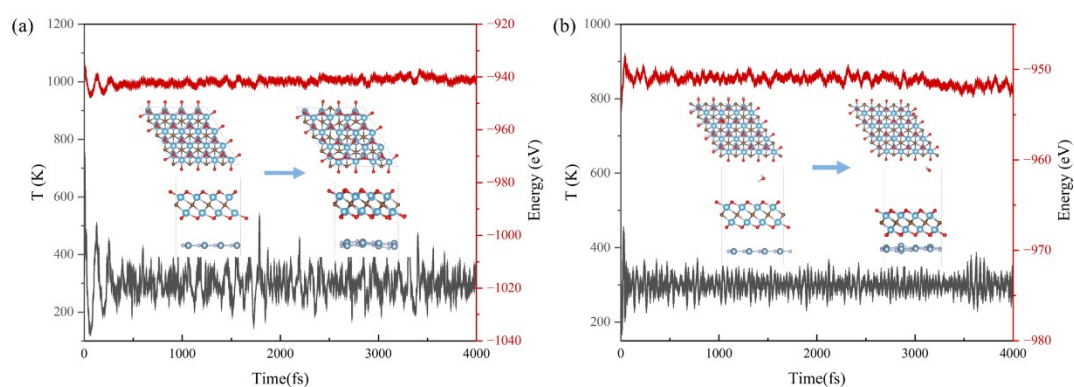

Figure S3. The fluctuations in temperature (black, left axis) and total energy (red, right axis) during AIMD simulations at 300 K for the AlN/Ti<sub>2</sub>CO<sub>2</sub> heterostructure with vacancies (a) and the AlN/Ti<sub>2</sub>CO<sub>2</sub> heterostructure adsorbed with water molecules (b).

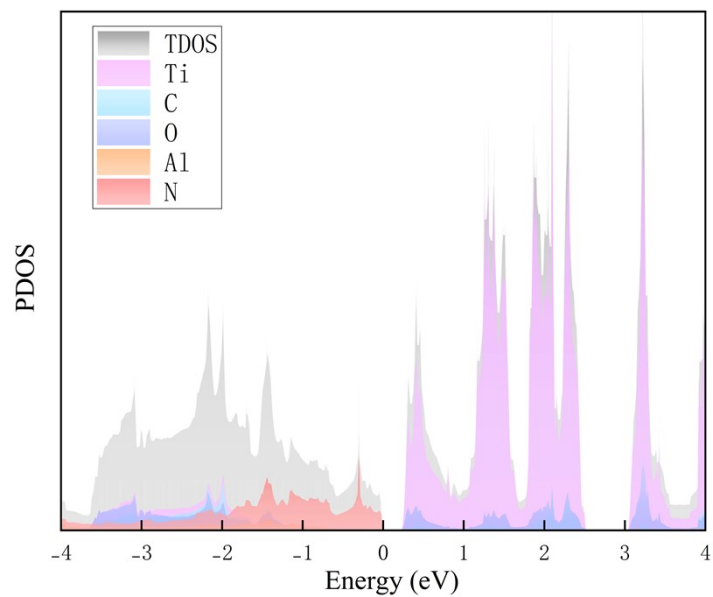

Figure S4. Projected density of states for AlN/Ti<sub>2</sub>CO<sub>2</sub> heterojunctions.

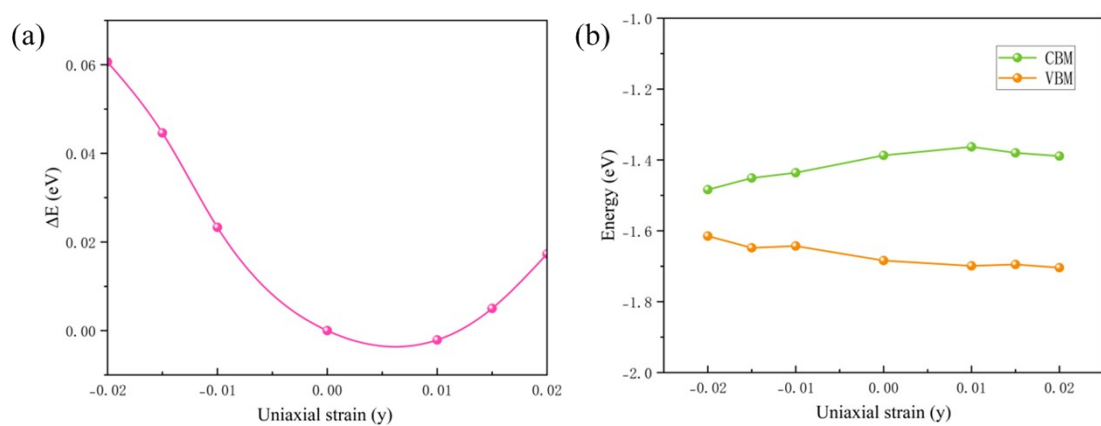

Figure S5. (a) The energy change, and (b) the band edge positions (CBM and VBM) of the heterostructures as a function of the uniaxial strain applied along y direction.

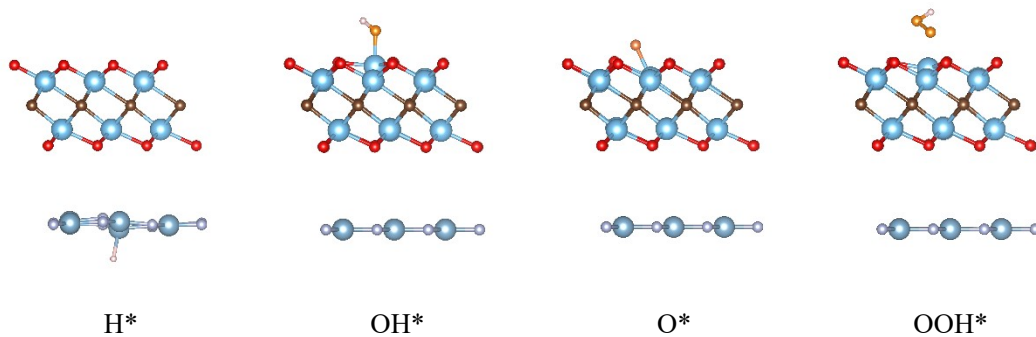

Figure S6. The intermediate structure of H\*, OH\*, O\*, and OOH\*

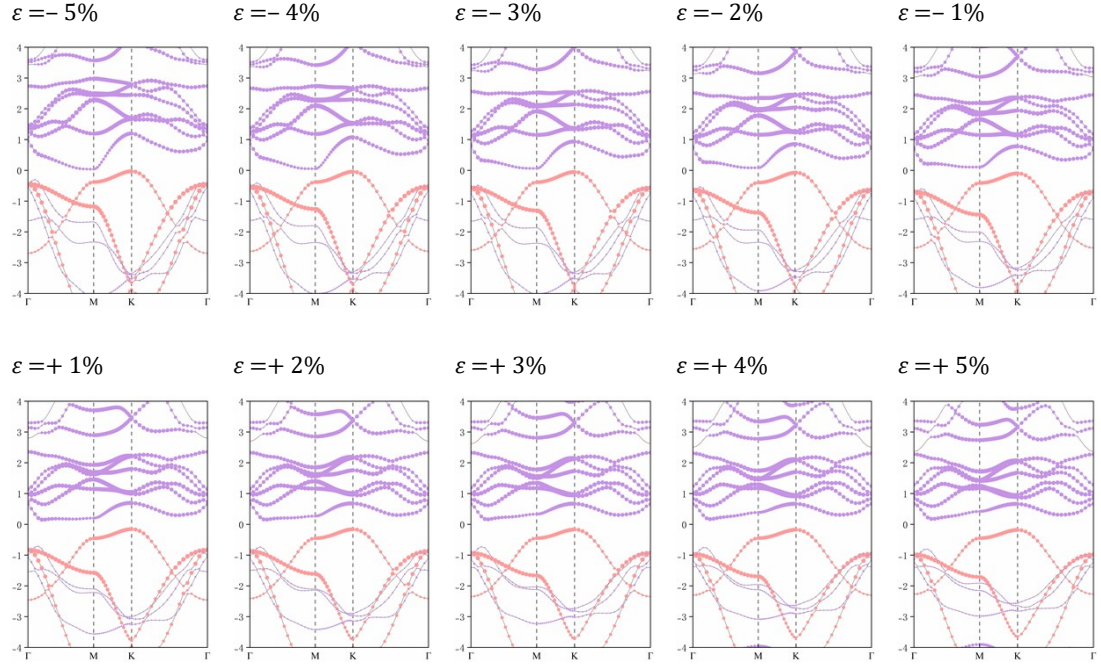

Figure S7. The band structures of the AlN/Ti<sub>2</sub>CO<sub>2</sub> heterojunction under strains.
